# Supplementary material for: Controllable synthesis of flower-like MoSe2 3D microspheres for highly efficient visible-light photocatalytic degradation of nitro-aromatic explosives
Source: Royal Society of Chemistry journal article supplement (doi:10.1039/c8ta02287a), 2018-01-01
Supplement: c8ta02287a1.pdf [file c8ta02287a1.pdf]

## Controllable synthesis of flower-like MoSe<sub>2</sub> 3D microspheres for highly efficient visible light photocatalyst degrading nitro-aromatic explosives

Jingwen Huang<sup>a</sup>, Bo Jin<sup>a\*</sup>, Huiqiang Liu<sup>b</sup>, Xiaojuan Li<sup>a</sup>, Qingchun Zhang<sup>a</sup>, Shijin Chu<sup>a</sup>, Rufang Peng<sup>a\*</sup> and Sheng Chu<sup>b\*</sup>

<sup>a</sup> State Key Laboratory of Environmental Friendly Energy Materials & School of Material Science and Engineering, Southwest University of Science and Technology, Mianyang 621010, Sichuan, P. R. China.

<sup>b</sup> State Key Laboratory of Optoelectronic Materials and Technology, Sun Yat-Sen University, Guangzhou 510275, Guangdong, P. R. China.

\* Corresponding author. Tel: +86-0816-2419011

**E-mail:** jinbo0428@163.com; rfpeng2006@163.com and chusheng@mail.sysu.edu.cn

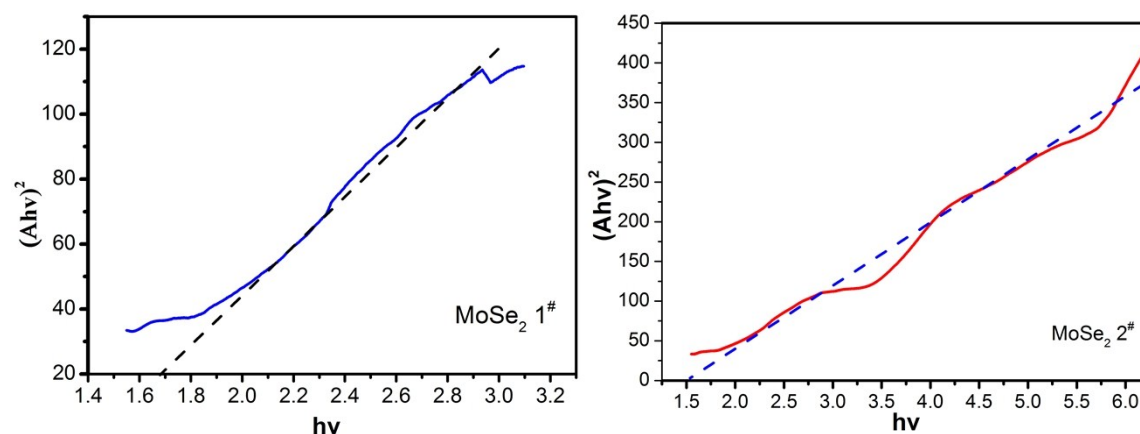

**Fig. S1** the curve of  $(Ah\nu)^2 - h\nu$  with the MoSe<sub>2</sub> sample 1# and 2# UV-Vis DRS spectrum

**Table S1.** The multi BET surface area transform data with a range of relative pressure

| MoSe <sub>2</sub> 1 <sup>#</sup> |                        | MoSe <sub>2</sub> 2 <sup>#</sup> |                        |
|----------------------------------|------------------------|----------------------------------|------------------------|
| BET transform                    |                        | BET transform                    |                        |
| P/P                              | $\frac{1}{W(P_0/P-1)}$ | P/P0                             | $\frac{1}{W(P_0/P-1)}$ |
| 0.0507                           | 21.8042                | 0.0507                           | 21.8042                |
| 0.09927                          | 37.9237                | 0.0992                           | 37.9327                |
| 0.14854                          | 52.8897                | 0.1485                           | 52.8897                |
| 0.1984                           | 67.6232                | 0.1984                           | 67.6232                |
| 0.2487                           | 82.5602                | 0.2487                           | 82.5602                |

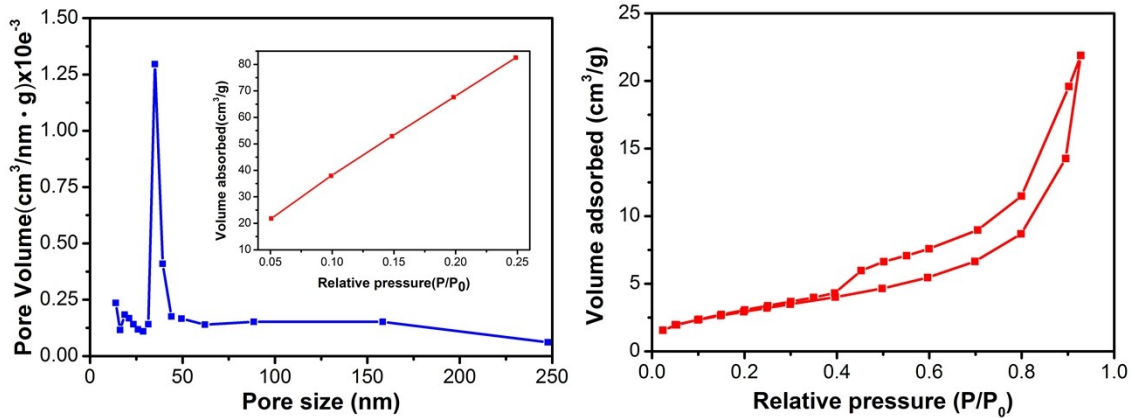

**Fig.S2** BET test with MoSe<sub>2</sub> nanospheres(sample2<sup>#</sup>) (a) Pore size distributions (inset) with corresponding surface area transform curve (b) Nitrogen adsorption–desorption isotherm

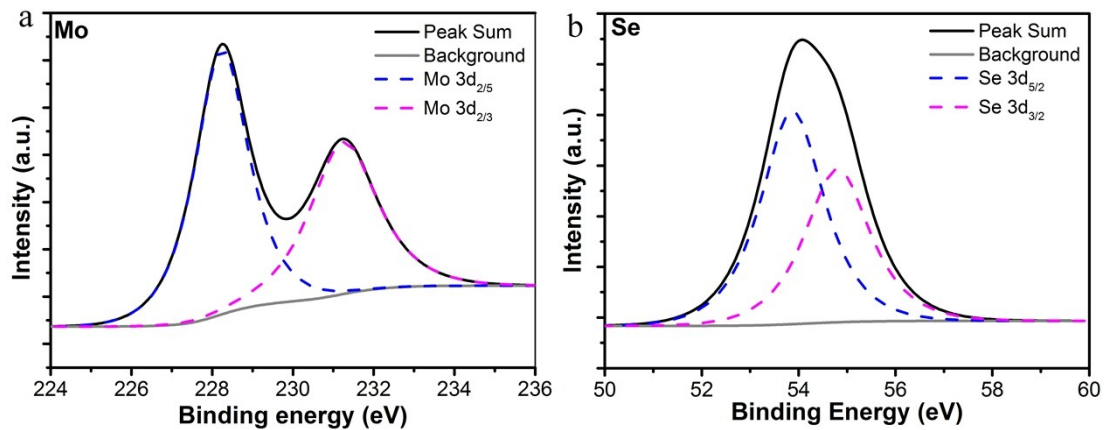

**Fig. S3** XPS spectrum of the MoSe<sub>2</sub> nanospheres(sample2<sup>#</sup>) (a)Mo 3d and (b) Se 3d

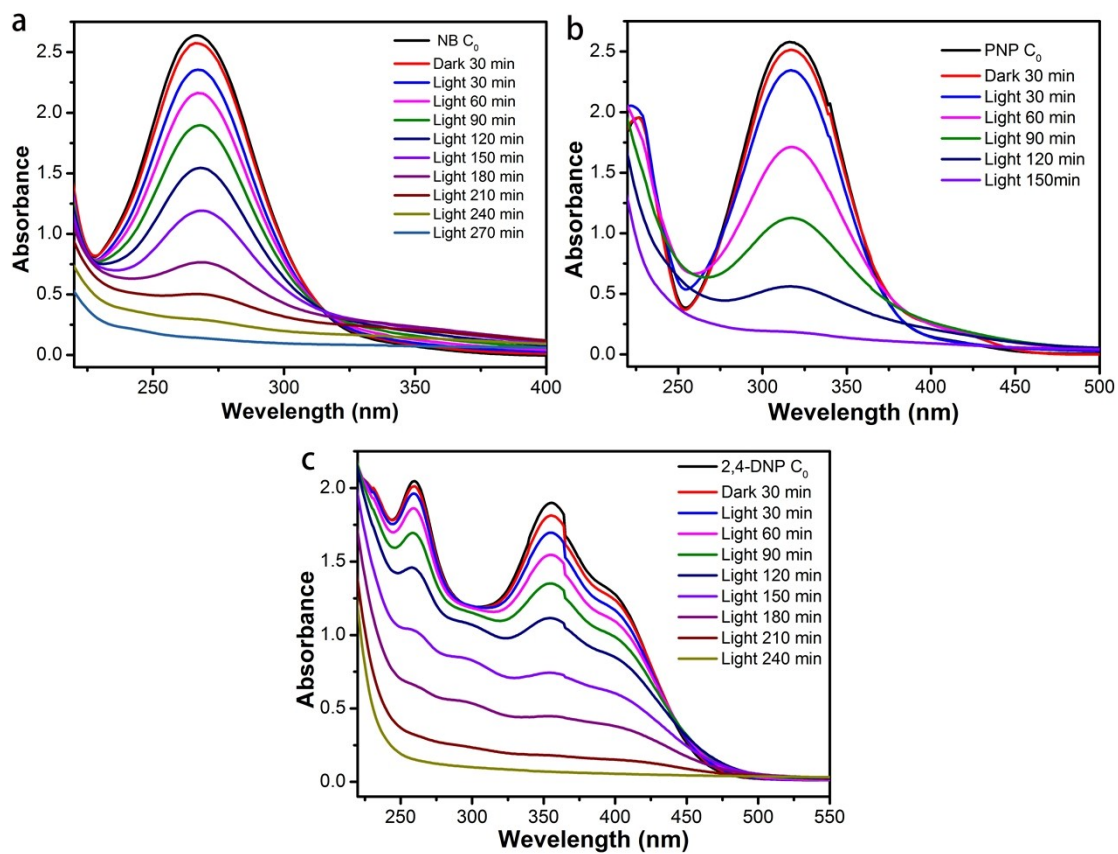

**Fig. S4** UV-Vis absorption spectra of the aqueous solution of NB(a), PNP(b) and 2, 4-DNP (c) adding MoSe<sub>2</sub> sample 2<sup>#</sup> catalyst under visible light irradiation.

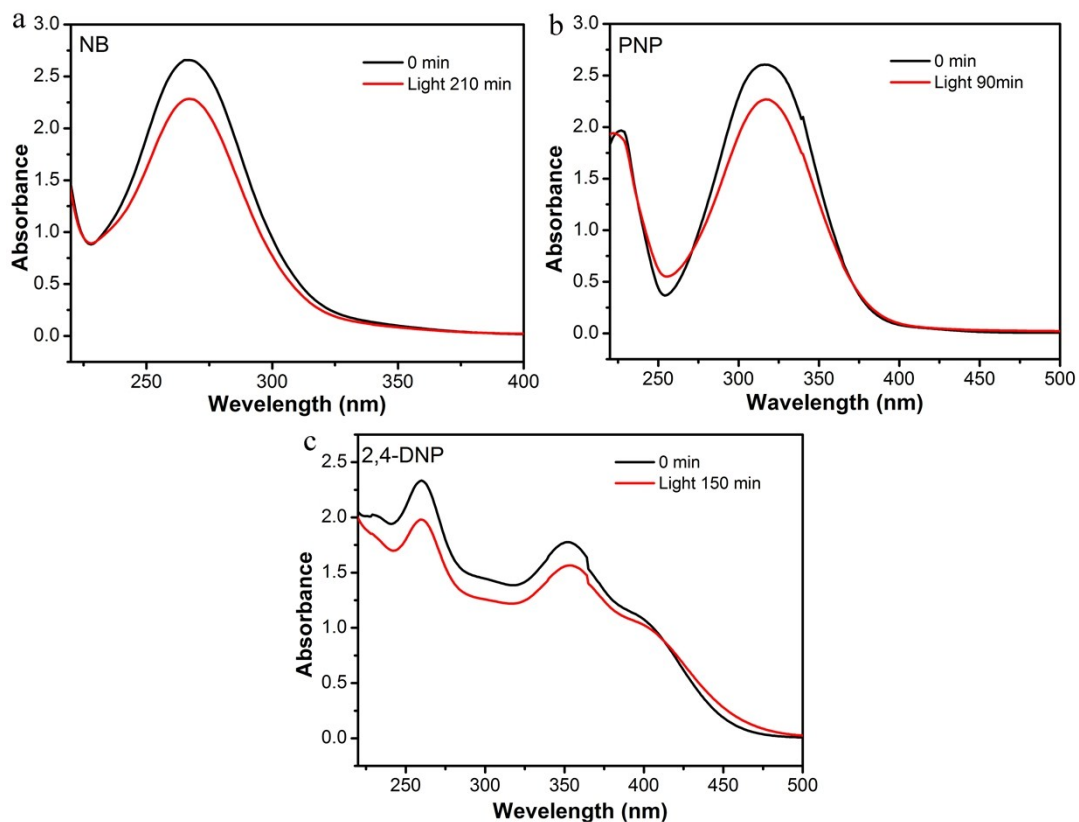

**Fig. S5** UV-Vis absorption spectra of the aqueous solution of NB(a), PNP(b) and 2,4-DNP(c) in absence of the MoSe<sub>2</sub> catalyst under visible light irradiation.

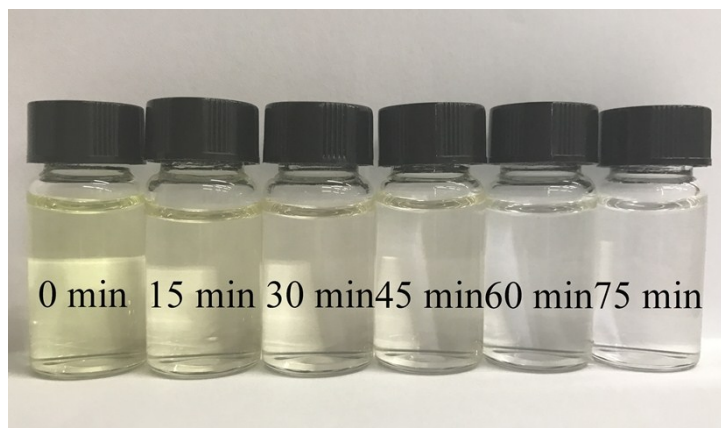

**Fig. S6** the chromatic changes of the PNP for each 15 min under the visible light irradiation with the MoSe<sub>2</sub> catalyst

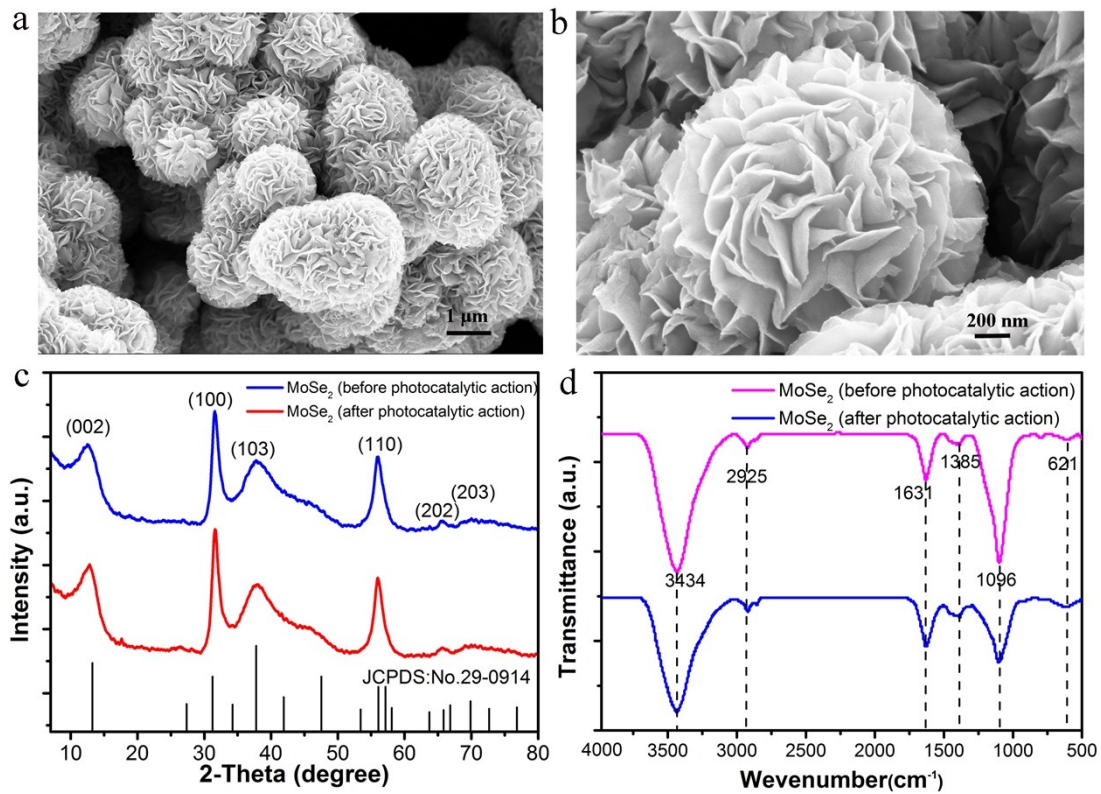

**Fig. S7** morphology and structure characterization of the flower-like MoSe<sub>2</sub> microspheres (sample 1<sup>#</sup>) before and after photocatalytic action (a,b) FETSEM images with different magnification (c) XRD spectra (d) FT- IR spectra

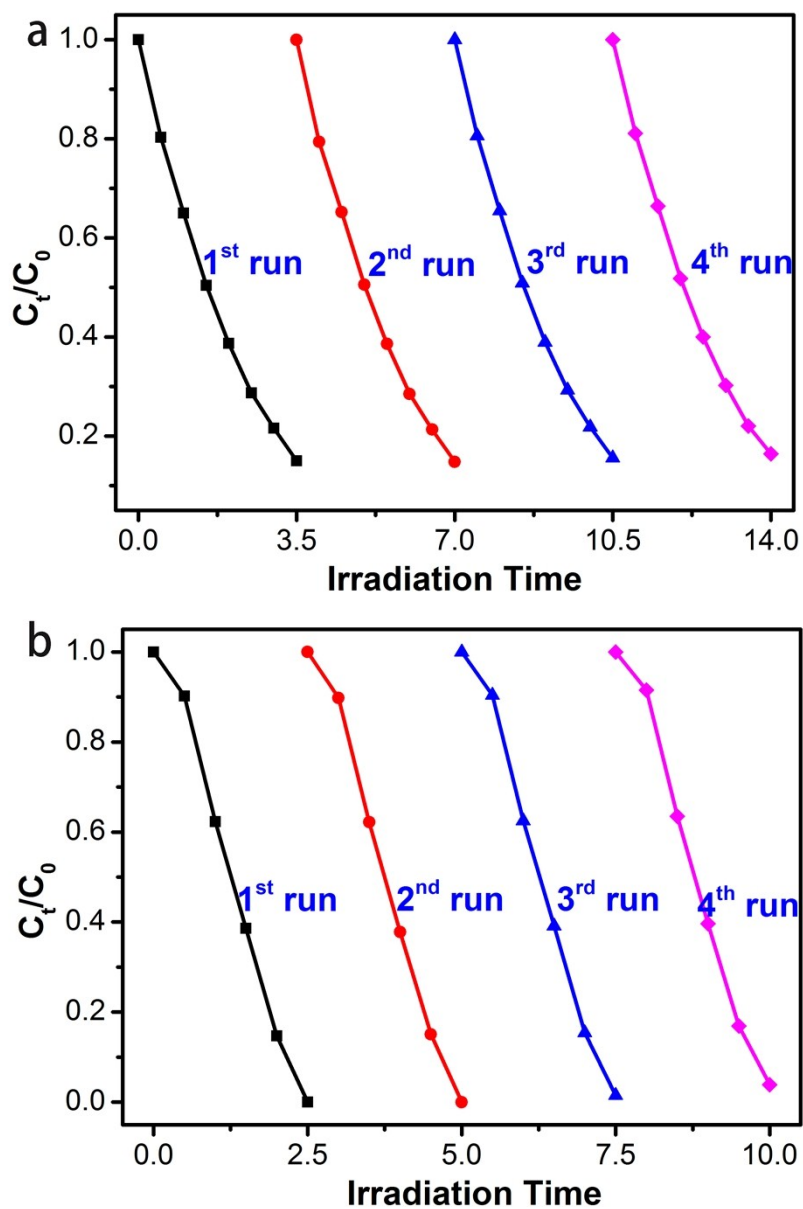

**Fig. S8** stability test for MoSe<sub>2</sub> microspheres (sample 1<sup>#</sup>) for photocatalytic degradation under visible light irradiation (a) NB and (b) 2,4-DNP
